# Supplementary material for: Do participatory scenario exercises promote systems thinking and build consensus?
Source: Oxford University Press journal article supplement (doi:10.12952/journal.elementa.000113), 2016-01-01
Supplement: elementa_000113_s001.docx [file elementa_000113_s001.docx]

Participant No. ____________ Survey Pre/Post (Burkina, Nigeria)

*Please complete this survey and return it to the facilitator if you choose to participate.*

1. What is your profession?
2. Where are you from (country, region)?
3. Please describe the most important challenge to **farmer livelihoods** your region will face in 2050.
4. Please describe the most important challenge to **agricultural production** your region will face in 2050.
5. Please list the following research priorities in terms of **how helpful** they will be in your region in the future (1 = extremely helpful; 2 = helpful; 3 = somewhat helpful; 4 = not very helpful; 5 = not helpful at all; 0= I’m not sure):

____ Dual purpose crops (for food and fodder) and fodder trees

____ Increased production from better tree/crop/livestock integration

____ Improved access to markets for all

____ Land tenure security

____ Improved access to credit, savings, subsidies, and insurance

____ Enriching agro-biodiversity

____ Empowering disadvantaged groups (women, youth, migrants) in decision making, resources & technology

____ Effective water harvesting and management

____ Strengthening local and national institutions, laws, bylaws and conventions

____ Incorporation of indigenous knowledge in agricultural systems

____ Development of perennial crops

Is there another priority (not on this list) which you would like to add?

Last four digits of your mobile no. ___________ Pre/Post Survey (Malawi)

*Please complete this survey and return it to the facilitator if you choose to participate.*

1. What is your profession?
2. Where are you from (country, region)?
3. Please describe the most important challenge to **farmer livelihoods** your region currently faces. Why is this the most important challenge?
4. Please describe the most important challenge to **agricultural production** your region currently faces. Why is this the most important challenge?
5. Please describe the most important challenge to **farmer livelihoods** your region will face in 2050. Why is this the most important challenge?
6. Please describe the most important challenge to **agricultural production** your region will face in 2050. Why is this the most important challenge?
7. Please rank the following priorities for improvement in the Malawian agricultural sector in order from 1 = most important to 10 = least important:

____ Improving soil fertility

____ Managing post-harvest losses and food waste

____ Developing disease- and drought-tolerant crop varieties

____ Reducing erosion

____ Improving water conservation and management

____ Increasing maize yields

____ Increasing legume production

____ Diversifying farming systems (for example, intercropping, agroforestry, or livestock integration)

____ Saving labor

____ Other (describe):

In your opinion, what is the best strategy (or strategies) for addressing the priority you ranked as #1 above?
