# Supplementary material for: Do participatory scenario exercises promote systems thinking and build consensus?
Source: Oxford University Press journal article supplement (doi:10.12952/journal.elementa.000113), 2016-01-01
Supplement: elementa_000113_s003.xls [file elementa_000113_s003.xls]

## Sheet: Burkina
Mali
		Dual PC		Incr Prod		Imp Acc		Land Ten		Credit		Biod		Enpow		Water		Inst		Ind Know		Per Crops
		pre	post	pre	post	pre	post	pre	post	pre	post	pre	post	pre	post	pre	post	pre	post	pre	post	pre	post
		3	1	1	1	4	2	1	1	4	4	2	3	3	2	4	3	3	4	3	2	5	5
		3	1	1	1	4	2	2	1	3	3	2	2	5	3	3	3	5	2	4	4	3	5
		2	1	1	1	1	1	1	1	1	2	2	1	2	2	2	3	1	1	1	2	1	2
		1	1	2	1	2	1	2	1	1	2	1	2	2	2	1	2	0	2	2	2	3	3
		2	2	1	1	2	2	3	2	2	2	3	3	2	3	3	3	2	2	2	3	4	4
		2	1	1	1	1	1	1	1	1	1	1	1	1	1	1	1	1	2	1	1	1	1
		1	1	1	1	1	1	2	1	2	2	2	1	2	2	3	1	1	2	1	2	2	1
		2	2	3	1	2	2	2	2	2	2	3	4	3	2	1	1	3	2	2	2	2	3
		2	3	2	2	1	3	2	1	2	3	3	4	4	2	2	2	3	3	1	2	1	1
		1	1	2	1	1	1	1	1	2	2	2	1	2	2	1	1	2	2	2	2	2	1
		2	3	3	3	1	1	1	1	1	2	4	4	2	2	2	2	2	2	3	4	4	5
		1	1	4	2	0	5	1	1	2	1	3	1	2	2	1	1	4	2	3	2	2	1
		3	2	4	2	1	1	2	1	3	2	3	2	2	1	2	1	1	2	2	1	3	2
		4	1	4	1	1	1	1	1	2	2	1	1	1	2	1	1	1	2	2	2	3	1
		1	2	1	0	1	1	1	2	1	1	1	0	1	1	1	1	1	2	1	3	1	0
		1	1	1	1	3	2	1	1	1	1	1	1	2	2	1	1	1	1	1	1	1	1
		1	1	1	3	2	1	1	1	2	2	1	4	1	1	1	1	1	1	3	1	1	2
		2	1	2	1	1	2	1	1	3	1	2	2	2	2	1	1	1	1	2	3	3	3
		1	1	0	4	0	1	2	2	3	2	0	3	5	1	1	1	2	2	2	3	3	3
		3	2	2	3	1	1	2	1	1	1	3	3	1	1	2	2	2	2	3	2	3	4
	mean	1.9	1.45	1.85	1.55	1.5	1.6	1.5	1.2	1.925	1.9	2	2.15	2.25	1.8	1.7	1.6	1.85	1.95	2.05	2.2	2.4	2.4
	SD	0.91191	0.686333	1.1821	0.998683	1.10024	0.994723	0.606977	0.410391	0.887041	0.788069	1.02598	1.26803	1.20852	0.615587	0.923381	0.820783	1.22582	0.686333	0.887041	0.894427	1.18766	1.56945
	T Test, p value		0.0704661		0.390048		0.7663		0.029815		0.771534		0.602913		0.0951648		0.493643		0.693922		0.505382		1
							Number of '1' Rankings
difference pre-post		pre	post	SD pre	SD post		pre	post
0.45	Dual Purpose Crops	1.9	1.45	0.91191	0.686333	0.225577	8	13	0.369565
0.3	Increased Production	1.85	1.55	1.1821	0.998683	0.18342	12	11	0.418367
-0.1	Improved Access	1.5	1.6	1.10024	0.994723	0.105516	11	12
0.3	Land Tenure	1.5	1.2	0.606977	0.410391	0.196586	11	16
0.025	Credit	1.925	1.9	0.887041	0.788069	0.0989723	7	6
-0.15	Biodiversity	2	2.15	1.02598	1.26803	-0.24205	6	7
0.45	Empowerment	2.25	1.8	1.20852	0.615587	0.592935	5	6
0.1	Water	1.7	1.6	0.923381	0.820783	0.102598	11	12
-0.1	Institutions	1.85	1.95	1.22582	0.686333	0.539486	9	4
-0.15	Indigenous Knowledge	2.05	2.2	0.887041	0.894427	-0.00738598	6	4
0	Perennial Crops	2.4	2.4	1.18766	1.56945	-0.381789	6	7
							92	98
Improved Access	1.5		Land Tenure	1.2
Land Tenure	1.5		Dual Purpose Crops	1.45
Water	1.7		Increased Production	1.55
Increased Production	1.85		Improved Access	1.6
Institutions	1.85		Water	1.6
Dual Purpose Crops	1.9		Empowerment	1.8
Credit	1.925		Credit	1.9
Biodiversity	2		Institutions	1.95
Indigenous Knowledge	2.05		Biodiversity	2.15
Empowerment	2.25		Indigenous Knowledge	2.2
Perennial Crops	2.4		Perennial Crops	2.4

## Sheet: Nigeria
	Dual PC		Incr Prod		Imp Acc		Land Ten		Credit		Biod		Enpow		Water		Inst		Ind Know		Per Crops
	pre	post	pre	post	pre	post	pre	post	pre	post	pre	post	pre	post	pre	post	pre	post	pre	post	pre	post
	2	1	1	1	1	1	2	2	1	2	2	3	2	2	2	1	1	2	0	2	2	2
	1	1	2	1	5	2	0	1	4	3	5	2	3	1	0	1	0	3	0	2	0	2
	1	1	2	2	2	2	2	3	3	3	2	2	3	3	3	2	3	2	3	2	4	3
	1	1	1	1	1	1	1	2	2	1	2	2	1	1	2	1	2	1	2	1	3	3
	3	1	1	2	2	2	3	1	5	2	2	2	2	1	1	2	1	2	1	1	2	1
	3	1	1	2	2	3	3	3	2	1	2	1	1	2	2	1	1	3	2	3	1	2
	1	2	1	1	2	2	2	1	1	1	2	2	1	2	2	2	2	3	2	4	1	4
	1	1	1	2	2	2	2	2	1	2	2	2	1	2	2	2	2	2	2	2	1	3
	1	1	2	1	1	1	2	2	2	1	2	1	1	1	2	1	2	1	2	1	2	1
	1	1	1	1	2	1	5	3	3	3	1	1	2	2	2	2	2	3	3	3	2	2
	1	1	1	1	1	1	1	1	3	2	2	1	1	2	1	1	1	1	2	1	1	1
	1	1	2	3	1	2	5	4	1	1	1	3	3	2	2	1	4	1	2	2	1	2
	2	1	1	1	1	1	0	1	1	1	2	1	1	4	1	1	4	1	3	2	1	2
	1	1	1	2	1	1	2	2	2	1	0	2	1	2	2	2	2	2	1	2	2	3
	0	2	0	1	0	2	0	1	0	2	0	1	0	1	0	2	0	2	0	1	0	2
	1	1	1	1	1	1	2	1	2	1	1	1	0	1	1	1	2	1	2	1	2	1
mean	1.3125	1.125	1.1875	1.4375	1.5625	1.5625	2	1.875	2.0625	1.6875	1.75	1.6875	1.4375	1.8125	1.5625	1.4375	1.8125	1.875	1.6875	1.875	1.5625	2.125
SD	0.7932	0.341565	0.543906	0.629153	1.09354	0.629153	1.50555	0.957427	1.28938	0.7932	1.12546	0.704154	0.963933	0.834166	0.813941	0.512348	1.16726	0.806226	1.01448	0.885061	1.03078	0.885061
t test, pvalue	0.456445		0.163876		1		0.632641		0.210818		0.842502		0.210818		0.580471		0.884497		0.530229		0.0951509
						Number of '1' Rankings
	pre	post	SD pre	SD post		pre	post		difference pre-post											1.63068
Dual Purpose Crops	1.3125	1.125	0.7932	0.341565	0.451635	11	14	0.46875	0.1875											1.68182
Increased Production	1.1875	1.4375	0.543906	0.629153	-0.0852472	11	10	0.388235	-0.25
Improved Access	1.5625	1.5625	1.09354	0.629153	0.464389	8	8		0
Land Tenure	2	1.875	1.50555	0.957427	0.548118	2	7		0.125
Credit	2.0625	1.6875	1.28938	0.7932	0.496179	5	8		0.375
Biodiversity	1.75	1.6875	1.12546	0.704154	0.421309	3	7		0.0625
Empowerment	1.4375	1.8125	0.963933	0.834166	0.129767	8	6		-0.375
Water	1.5625	1.4375	0.813941	0.512348	0.301593	4	9		0.125
Institutions	1.8125	1.875	1.16726	0.806226	0.361036	4	6		-0.0625
Indigenous Knowledge	1.6875	1.875	1.01448	0.885061	0.129417	2	6		-0.1875
Perennial Crops	1.5625	2.125	1.03078	0.885061	0.145715	6	4		-0.5625
						64	85
Increased Production	1.1875		Dual Purpose Crops	1.125
Dual Purpose Crops	1.3125		Increased Production	1.4375
Empowerment	1.4375		Water	1.4375
Improved Access	1.5625		Improved Access	1.5625
Water	1.5625		Credit	1.6875
Perennial Crops	1.5625		Biodiversity	1.6875
Indigenous Knowledge	1.6875		Empowerment	1.8125
Biodiversity	1.75		Land Tenure	1.875
Institutions	1.8125		Institutions	1.875
Land Tenure	2		Indigenous Knowledge	1.875
Credit	2.0625		Perennial Crops	2.125
	1.63068			1.68182
